# Supplementary figures and images for: Analysis of innate defences against Plasmodium falciparum in immunodeficient mice
Source: Springer Nature journal article supplement (doi:10.1186/1475-2875-9-197), 2010-07-09

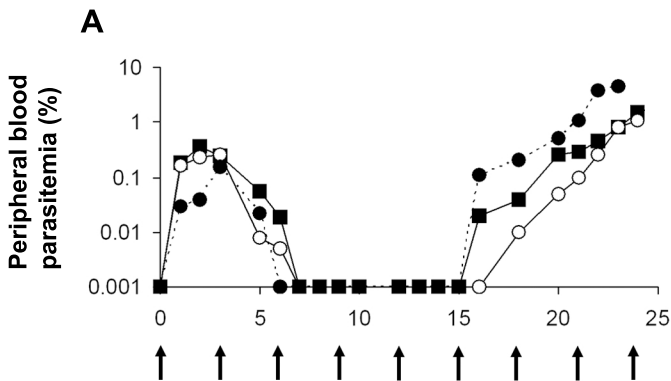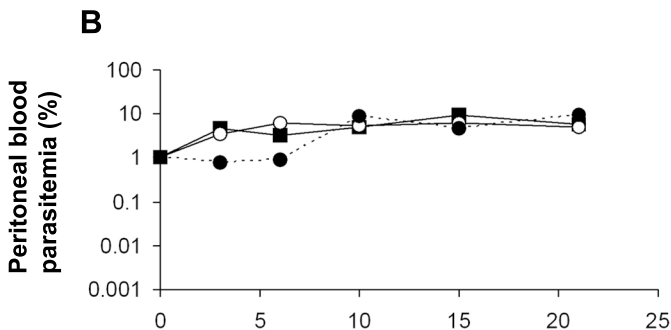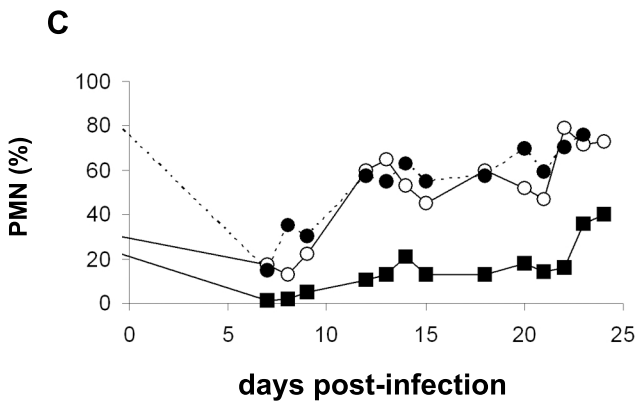

Supplement: Additional file 1 [file 1475-2875-9-197-s1.pdf]
